# Supplementary material for: Identification of Potential New Aedes aegypti Juvenile Hormone Inhibitors from N-Acyl Piperidine Derivatives: A Bioinformatics Approach
Source: MDPI journal article supplement (doi:10.3390/ijms23179927), 2022-09-01
Supplement: s1 [file s1]

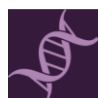

Article

# Identification of Potential New *Aedes aegypti* Juvenile Hormone Inhibitors from N-Acyl Piperidine Derivatives: A Bioinformatics Approach

Lúcio R. Lima <sup>1,2</sup>, Ruan S. Bastos <sup>1,2</sup>, Elenilze F. B. Ferreira <sup>2,3</sup>, Rozires P. Leão <sup>1,2</sup>, Pedro H. F. Araújo <sup>2</sup>, Samuel S. da R. Pita <sup>4</sup>, Humberto F. De Freitas <sup>4,5</sup>, José M. Espejo-Román <sup>6</sup>, Edla L. V. S. Dos Santos <sup>2</sup>, Ryan da S. Ramos <sup>2</sup>, Williams J. C. Macêdo <sup>2,7</sup> and Cleydson B. R. Santos <sup>1,2,\*</sup>

- <sup>1</sup> Graduate Program in Medicinal Chemistry and Molecular Modeling, Federal University of Pará, Belém, PA, 66075-110, Brazil.
  - <sup>2</sup> Laboratory of Modeling and Computational Chemistry, Department of Biological and Health Sciences, Federal University of Amapá, Macapá, 68902-280, AP, Brazil.
  - <sup>3</sup> Laboratory of Organic Chemistry and Biochemistry, University of the State of Amapá, Macapá, 68900-070, AP, Brazil.
  - <sup>4</sup> Bioinformatics and Molecular Modeling Laboratory, Federal University of Bahia, Av. Barão de Jeremoabo, 147, Pharmacy College, Ondina, Salvador, 40170-115, BA, Brazil.
  - <sup>5</sup> Health department, State University of Feira de Santana, Feira de Santana, 44036-900 BA, Brazil
  - <sup>6</sup> Department of Pharmaceutical and Organic Chemistry, Faculty of Pharmacy, Campus of Cartuja, University of Granada, 18071, Granada, Spain.
  - <sup>7</sup> Laboratory of Molecular Modeling and Simulation System, Federal Rural University of Amazônia, Rua João Pessoa, 121, Capanema, 68700-030 PA, Brazil.
- \* Correspondence: breno@unifap.br (C.B.R.S)

**Citation:** Lastname, F.; Lastname, F.; Lastname, F. Title. *Int. J. Mol. Sci.* **2021**, *22*, x.  
<https://doi.org/10.3390/xxxxx>

Academic Editor: Firstname Last-name

Received: date  
Accepted: date  
Published: date

**Publisher's Note:** MDPI stays neutral with regard to jurisdictional claims in published maps and institutional affiliations.

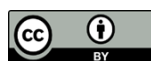

**Copyright:** © 2021 by the authors. Submitted for possible open access publication under the terms and conditions of the Creative Commons Attribution (CC BY) license (<https://creativecommons.org/licenses/by/4.0/>).

## Supplementary Material

Table S1. Pharmacophoric Model description, spatial coordinates, and radius.  
Table S2. Pharmacophoric discrimination for structures with pLD<sub>50</sub> values  
Table S3. Physicochemical properties used as maximum and minimum filters.  
Table S4. Prediction and identification of toxicophoric groups and their respective LD<sub>50</sub> values.  
Table S5. Binding affinity and interactions of best ranked compounds with the *Aedes aegypti* Mosquito Juvenile Hormone-Binding Protein (AagJHBP, PDB ID 5V13).  
Table S6. Lipophilicity prediction (LogPo/w) through the SwissADME webserver ([52], <http://www.swissadme.ch/>).  
Table S7. Solubility prediction (LogS) in water through the SwissADME webserver ([52], <http://www.swissadme.ch/>).

Figure S1. N-acyl piperidine derivatives 2D structures.

Figure S2. Main structural differences between N-acyl piperidine derivatives. (a) 15/21; (b) 13/30; (c) 23/27; (d) 03/08; (e) 19/26; (f) 17/25; (g) 20/28.

Figure S3. Structural superposition of crystallographic (green) and better docked pose (red) of JHII.

Figure S4. Secondary structure evaluation for productive phase of *Aedes aegypti* Juvenile Hormone-Binding Protein (AagJHBP) complexes analyzed by DSSP 3.1.4 [39–41] module installed on GROMACS 5.1.4 [37,38]. From upper left corner to the right: apo, holo, Pyri, MP-073 and MP-416.

Table S1. Pharmacophoric Model description, spatial coordinates and radius.

| Pharmacophoric Characteristics |       | Coordinates |         |         | Radius |
|--------------------------------|-------|-------------|---------|---------|--------|
|                                |       | x           | y       | z       |        |
| Hydrogen Acceptor              | Acc 1 | 20.904      | -3.916  | -1.2852 | 0.5    |
| Hydrophobic                    | Hyd 1 | 17.7439     | -4.8853 | -2.2365 | 1.0    |
| Hydrophobic                    | Hyd 2 | 16.4929     | -4.6804 | -2.3077 | 1.0    |

|             |       |         |         |         |     |
|-------------|-------|---------|---------|---------|-----|
| Hydrophobic | Hyd 3 | 15.2453 | -4.4747 | -2.3858 | 1.0 |
| Hydrophobic | Hyd 4 | 24.6374 | -5.4326 | -2.516  | 1.0 |
| Hydrophobic | Hyd 5 | 24.2432 | -6.5995 | -2.7644 | 1.0 |

Table S2. Pharmacophoric discrimination for structures with pLD<sub>50</sub> values.

| Structure | ATM | SF | ARO | HYD | ACC | pLD <sub>50</sub> |
|-----------|-----|----|-----|-----|-----|-------------------|
| 1         | 53  | 12 | 1   | 10  | 1   | 4.99              |
| 2         | 51  | 12 | 1   | 10  | 1   | 4.81              |
| 3         | 60  | 14 | 1   | 12  | 1   | 4.63              |
| 4         | 54  | 13 | 1   | 11  | 1   | 4.61              |
| 5         | 55  | 14 | 0   | 13  | 1   | 4.49              |
| 6         | 40  | 10 | 2   | 5   | 3   | 4.45              |
| 7         | 55  | 15 | 0   | 14  | 1   | 4.38              |
| 8         | 60  | 14 | 1   | 12  | 1   | 4.34              |
| 9         | 49  | 13 | 0   | 12  | 1   | 4.29              |
| 10        | 44  | 13 | 0   | 12  | 1   | 4.24              |
| 11        | 47  | 13 | 0   | 12  | 1   | 4.23              |
| 12        | 38  | 9  | 0   | 8   | 1   | 4.10              |
| 13        | 49  | 12 | 0   | 11  | 1   | 4.03              |
| 14        | 60  | 13 | 1   | 11  | 1   | 4.02              |
| 15        | 50  | 13 | 0   | 12  | 1   | 4.01              |
| 16        | 40  | 10 | 0   | 9   | 1   | 3.99              |
| 17        | 44  | 12 | 0   | 11  | 1   | 3.91              |
| 18        | 41  | 11 | 0   | 10  | 1   | 3.91              |
| 19        | 41  | 10 | 0   | 9   | 1   | 3.90              |
| 20        | 44  | 11 | 0   | 10  | 1   | 3.89              |
| 21        | 50  | 13 | 0   | 12  | 1   | 3.89              |
| 22        | 40  | 9  | 0   | 8   | 1   | 3.75              |
| 23        | 53  | 14 | 0   | 13  | 1   | 3.74              |
| 24        | 50  | 12 | 0   | 11  | 1   | 3.72              |
| 25        | 44  | 12 | 0   | 11  | 1   | 3.71              |
| 26        | 41  | 10 | 0   | 9   | 1   | 3.70              |
| 27        | 53  | 14 | 0   | 13  | 1   | 3.67              |
| 28        | 44  | 11 | 0   | 10  | 1   | 3.66              |
| 29        | 47  | 12 | 0   | 11  | 1   | 3.57              |
| 30        | 49  | 12 | 0   | 11  | 1   | 3.52              |

Table S3. Physicochemical properties for structures with pLD<sub>50</sub> values.

| Structures | MW <sup>[a]</sup> | RotB <sup>[a]</sup> | LogP <sup>[b]</sup> | PSA <sup>[a]</sup> | N°Rings <sup>[a]</sup> | HBA <sup>[a]</sup> | HBD <sup>[a]</sup> |
|------------|-------------------|---------------------|---------------------|--------------------|------------------------|--------------------|--------------------|
| 1          | 301.47            | 9                   | 5.70                | 20.31              | 2                      | 1                  | 0                  |
| 2          | 299.45            | 5                   | 4.98                | 20.31              | 3                      | 1                  | 0                  |
| 3          | 341.53            | 12                  | 6.70                | 20.31              | 2                      | 1                  | 0                  |

|         |        |    |      |       |   |   |   |
|---------|--------|----|------|-------|---|---|---|
| 4       | 313.48 | 6  | 5.25 | 20.31 | 3 | 1 | 0 |
| 5       | 281.48 | 11 | 6.38 | 20.31 | 1 | 1 | 0 |
| 6       | 285.34 | 4  | 3.33 | 38.78 | 3 | 3 | 0 |
| 7       | 281.48 | 11 | 6.29 | 20.31 | 1 | 1 | 0 |
| 8       | 341.53 | 12 | 6.70 | 20.31 | 2 | 1 | 0 |
| 9       | 253.42 | 9  | 5.28 | 20.31 | 1 | 1 | 0 |
| 10      | 237.38 | 3  | 3.62 | 20.31 | 2 | 1 | 0 |
| 11      | 251.41 | 5  | 4.33 | 20.31 | 2 | 1 | 0 |
| 12      | 209.33 | 2  | 3.10 | 20.31 | 2 | 1 | 0 |
| 13      | 253.42 | 9  | 5.37 | 20.31 | 1 | 1 | 0 |
| 14      | 341.53 | 12 | 6.82 | 20.31 | 2 | 1 | 0 |
| 15      | 265.43 | 10 | 5.27 | 20.31 | 1 | 1 | 0 |
| 16      | 211.34 | 6  | 3.77 | 20.31 | 1 | 1 | 0 |
| 17      | 237.38 | 4  | 3.83 | 20.31 | 2 | 1 | 0 |
| 18      | 223.35 | 3  | 3.55 | 20.31 | 2 | 1 | 0 |
| 19      | 223.35 | 3  | 3.64 | 20.31 | 2 | 1 | 0 |
| 20      | 237.38 | 5  | 3.76 | 20.31 | 2 | 1 | 0 |
| 21      | 265.43 | 10 | 5.27 | 20.31 | 1 | 1 | 0 |
| 22      | 211.34 | 6  | 3.85 | 20.31 | 1 | 1 | 0 |
| 23      | 279.46 | 11 | 5.95 | 20.31 | 1 | 1 | 0 |
| 24      | 265.43 | 10 | 5.36 | 20.31 | 1 | 1 | 0 |
| 25      | 237.38 | 4  | 3.83 | 20.31 | 2 | 1 | 0 |
| 26      | 223.35 | 2  | 2.96 | 20.31 | 2 | 1 | 0 |
| 27      | 279.46 | 11 | 5.77 | 20.31 | 1 | 1 | 0 |
| 28      | 237.38 | 4  | 3.91 | 20.31 | 2 | 1 | 0 |
| 29      | 251.41 | 5  | 4.45 | 20.31 | 2 | 1 | 0 |
| 30      | 253.42 | 9  | 5.40 | 20.31 | 1 | 1 | 0 |
| <hr/>   |        |    |      |       |   |   |   |
| Minimum | 211.34 | 2  | 2.96 | 20.31 | 1 | 1 | 0 |
| Maximum | 341.53 | 12 | 6.82 | 38.78 | 3 | 3 | 0 |

[a] Protox II ([https://tox-new.charite.de/prottox\\_II/](https://tox-new.charite.de/prottox_II/)); [b] Molinspiration (<https://www.molinspiration.com/>); MW=molecular weight; RotB=rotatable bonds; LogP=lipophilicity or hydrophobicity; PSA=polar surface area; HBA=hydrogen bond acceptors; HBD=hydrogen bond donator.

Table S4. Toxicology analysis and LD<sub>50</sub> values for compounds.

| Structures          | Toxicity Prediction Alert (in human, rat and mouse) | Toxicophoric Group    | Toxicity Alert | Toxicity Class <sup>[a]</sup> | LD <sub>50</sub> <sup>[b]</sup> |
|---------------------|-----------------------------------------------------|-----------------------|----------------|-------------------------------|---------------------------------|
| Pivot               | Phospholipidosis                                    | Etamine or piperidine | Plausible      | 4                             | 1000                            |
| Pyriproxyfen        | -                                                   | -                     | No alert       | 5                             | 2830                            |
| <b>Hypothesis 1</b> |                                                     |                       |                |                               |                                 |
| MP-961              | -                                                   | -                     | No alert       | 5                             | 2100                            |
| MP-779              | -                                                   | -                     | No alert       | 6                             | 5400                            |
| MP-073              | -                                                   | -                     | No alert       | 6                             | 20000                           |
| MP-897              | -                                                   | -                     | No alert       | 6                             | 20000                           |
| MP-488              | -                                                   | -                     | No alert       | 6                             | 5400                            |
| MP-416              | -                                                   | -                     | No alert       | 4                             | 955                             |
| MP-930              | -                                                   | -                     | No alert       | 6                             | 20000                           |
| MP-557              | -                                                   | -                     | No alert       | 5                             | 5000                            |
| MP-112              | -                                                   | -                     | No alert       | 4                             | 350                             |
| <b>Hypothesis 3</b> |                                                     |                       |                |                               |                                 |
| MP-020              | -                                                   | -                     | No alert       | 6                             | 20000                           |
| MP-232              | -                                                   | -                     | No alert       | 4                             | 1000                            |
| MP-290              | -                                                   | -                     | No alert       | 5                             | 2500                            |

[a]Class 1: fatal if ingested. ( $LD_{50} \leq 5$ ); Class 2: fatal if ingested ( $5 < LD_{50} \leq 50$ ); Class 3: toxic if ingested ( $50 < LD_{50} \leq 300$ ); Class 4: dangerous if ingested ( $300 < LD_{50} \leq 2000$ ); Class 5: can be dangerous if ingested ( $2000 < LD_{50} \leq 5000$ ); Class 6: non toxic ( $LD_{50} > 5000$ ). Data obtained from the Protox II online server ([https://tox-new.charite.de/protox\\_II/](https://tox-new.charite.de/protox_II/)). [b]LD<sub>50</sub>= mg.kg<sup>-1</sup>.

Table S5. Binding affinity and interactions of best ranked compounds with the *Aedes aegypti* Mosquito Juvenile Hormone-Binding Protein (AagJHBP, PDB ID 5V13).

| Structures                            | $\Delta G^{[a]}$ | Hydrogen Bonding<br>(Distance) | Hydrophobic Interactions                                                                                                                      |
|---------------------------------------|------------------|--------------------------------|-----------------------------------------------------------------------------------------------------------------------------------------------|
| JHIII<br>(Complex ligand)             | -7.53            | TYR129 (2.75 Å)                | TYR33, VAL34, VAL51, TRP53, PRO55, TYR64, VAL65, VAL68, TYR129, PHE144, PHE269, TRP278 and ALA281.                                            |
| Pyriproxyfen<br>(Commercial Compound) | -10.04           | TYR129 (2.22 Å)                | TYR33, VAL51, TRP53, PRO55, TYR64, VAL65, VAL68, TYR129, TYR133, PHE144 and ALA281.                                                           |
| MP-779                                | -6.21            | -                              | TYR33, LEU37, TRP50, VAL51, TRP53, PRO55, TYR64, VAL65, VAL68, TYR133, GLY146, PHE269, TRP278 and ALA281.                                     |
| MP-073                                | -9.48            | TYR33 (3.47 Å)                 | TYR33, LEU37, VAL51, TYR64, VAL68, TYR129, TYR133 and ALA281.                                                                                 |
| MP-416                                | -10.06           | -                              | LEU30, TYR33, VAL34, LEU37, TRP50, VAL51, TRP53, PRO55, TYR64, VAL65, VAL68, LEU72, LEU74, TYR129, TYR133, PHE144, PHE269, TRP278 and ALA281. |
| MP-112                                | -7.36            | TRP53 (3.05 Å)                 | TYR33, VAL34, LEU37, TRP50, VAL51, TRP53, PRO55, TRP64, VAL65, VAL68, TYR133, PHE269, TRP278 and ALA281.                                      |

<sup>[a]</sup> Binding energy of the best conformation (kcal. mol<sup>-1</sup>).

Table S6. Lipophilicity prediction (LogPo/w) through the SwissADME webserver ([52], <http://www.swissadme.ch/>).

| Molecule            | iLOGP | XLOGP | WLOGP | MLOGP | SILICOS-IT | Consensus |
|---------------------|-------|-------|-------|-------|------------|-----------|
| <b>Pivot</b>        | 4.04  | 5.42  | 4.45  | 4.04  | 5.12       | 4.61      |
| <b>Pyriproxyfen</b> | 3.94  | 5.52  | 5.33  | 4.04  | 4.63       | 4.69      |
| <b>MP-779</b>       | 2.95  | 3.35  | 2.87  | 3.67  | 3.58       | 3.28      |
| <b>MP-073</b>       | 2.86  | 2.84  | 2.48  | 3.44  | 2.67       | 2.86      |
| <b>MP-416</b>       | 3.82  | 4.21  | 3.78  | 3.39  | 4.20       | 3.88      |
| <b>MP-112</b>       | 3.02  | 4.50  | 4.87  | 2.89  | 3.93       | 3.84      |

Table S7. Water solubility prediction (LogS) through the SwissADME webserver ([52], <http://www.swissadme.ch/>).

| Molecule            | ESOL  | Ali   | SILICOS-IT | Consensus |
|---------------------|-------|-------|------------|-----------|
| <b>Pivot</b>        | -4.73 | -5.60 | -6.05      | -5.46     |
| <b>Pyriproxyfen</b> | -5.40 | -5.86 | -7.47      | -6.24     |
| <b>MP-779</b>       | -3.98 | -3.81 | -4.30      | -4.03     |
| <b>MP-073</b>       | -3.58 | -3.28 | -3.47      | -3.44     |
| <b>MP-416</b>       | -4.42 | -4.41 | -6.21      | -5.01     |
| <b>MP-112</b>       | -4.37 | -5.01 | -4.55      | -4.64     |

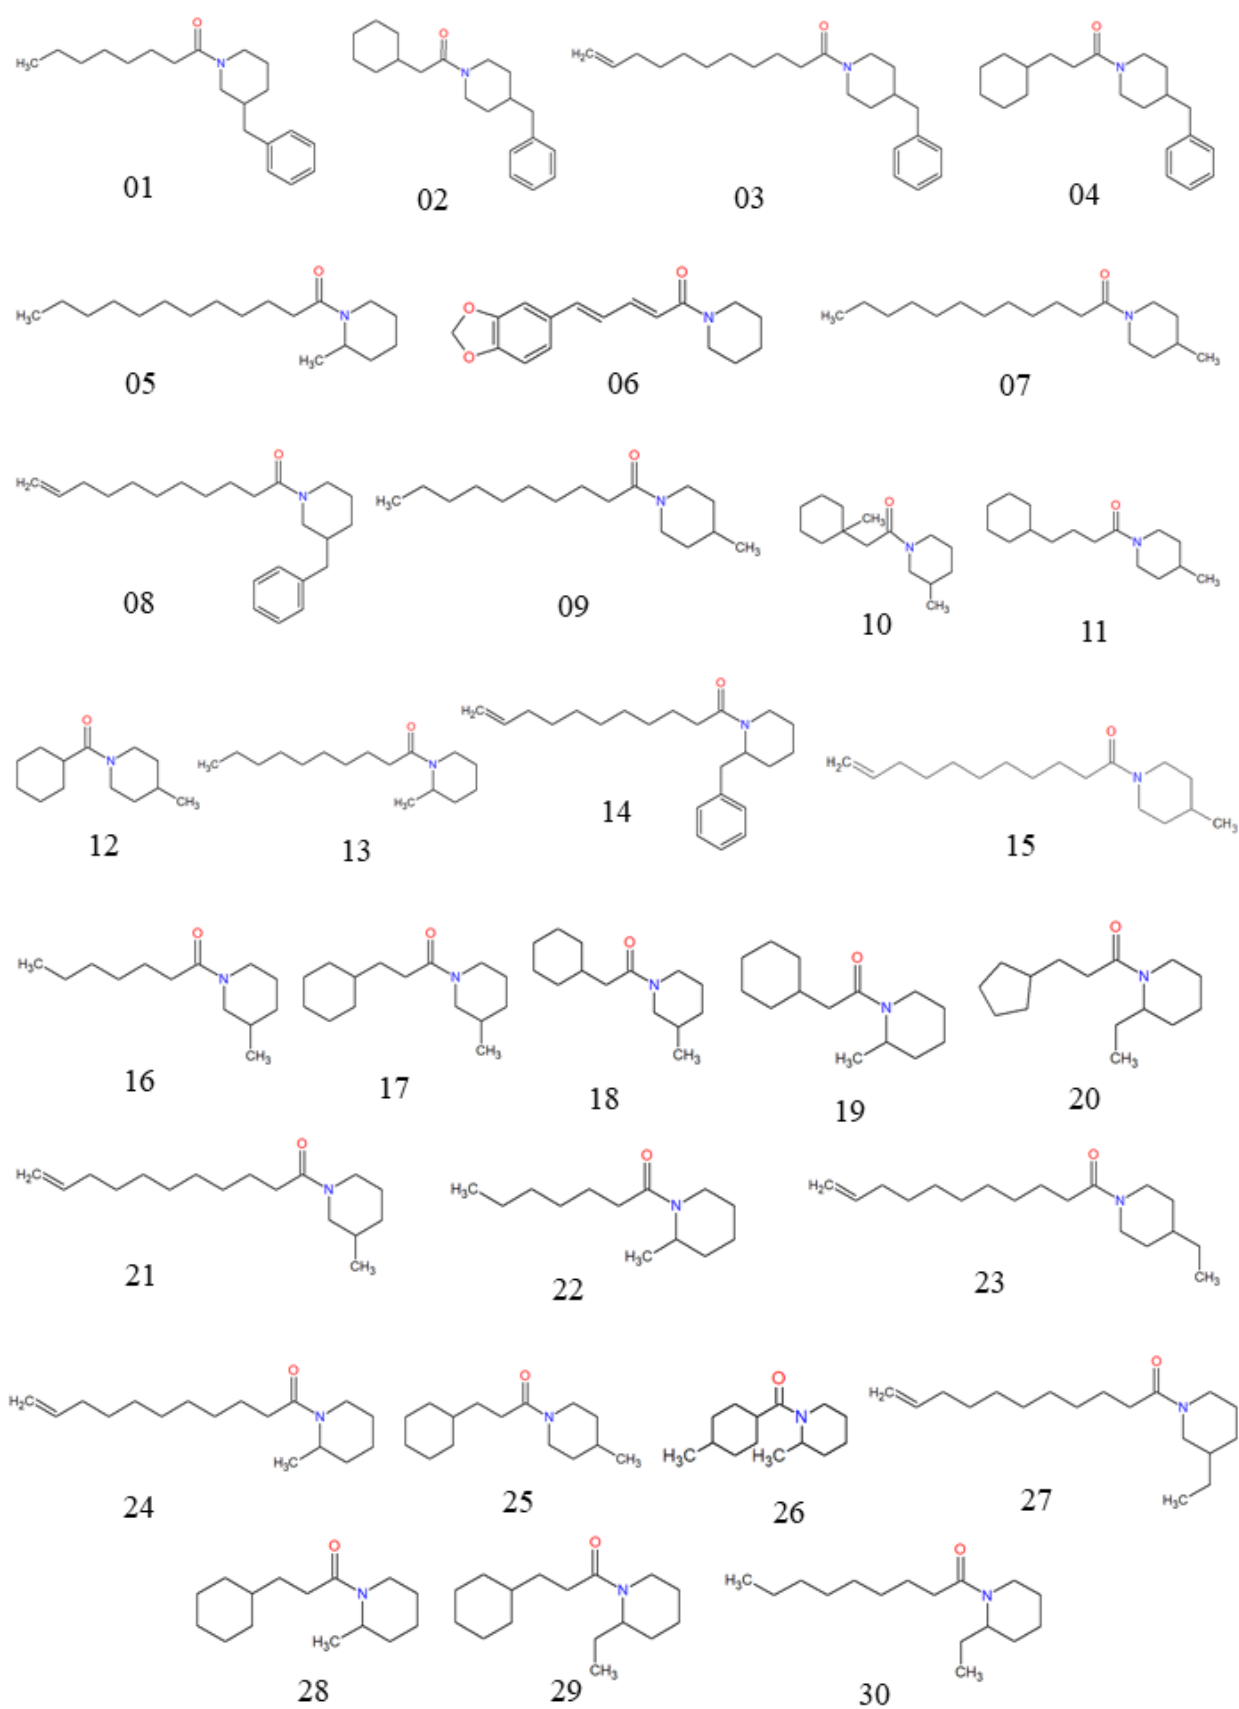

Figure S1. N-acyl piperidine derivatives 2D structures.

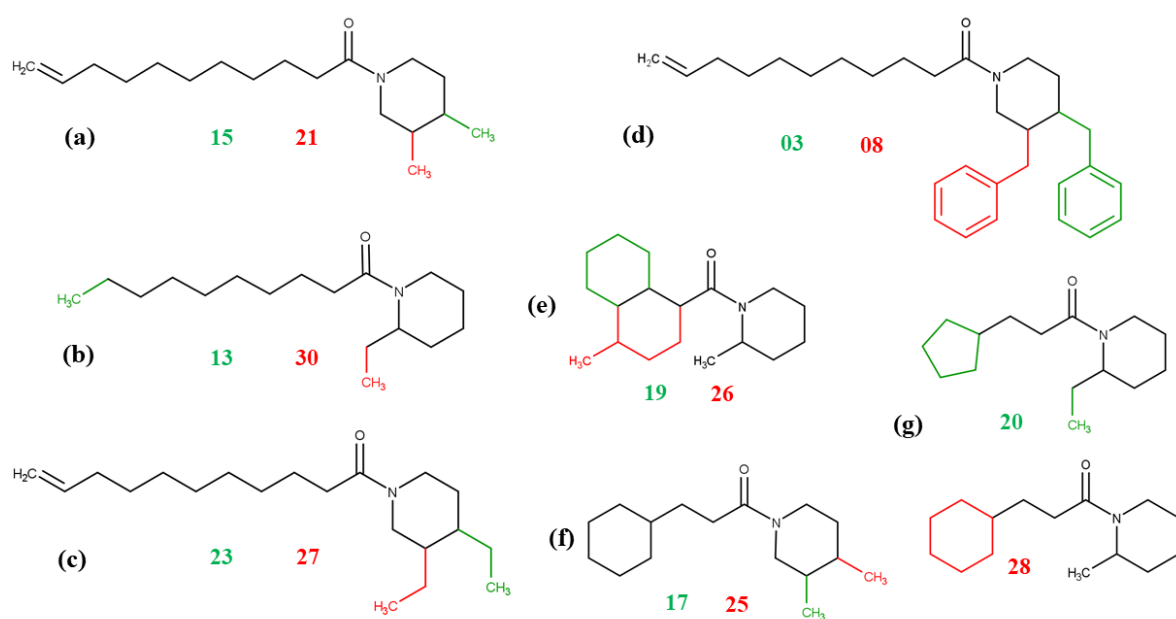

Figure S2. Main structural differences between N-acyl piperidine derivatives. (a) 15/21; (b) 13/30; (c) 23/27; (d) 03/08; (e) 19/26; (f) 17/25; (g) 20/28.

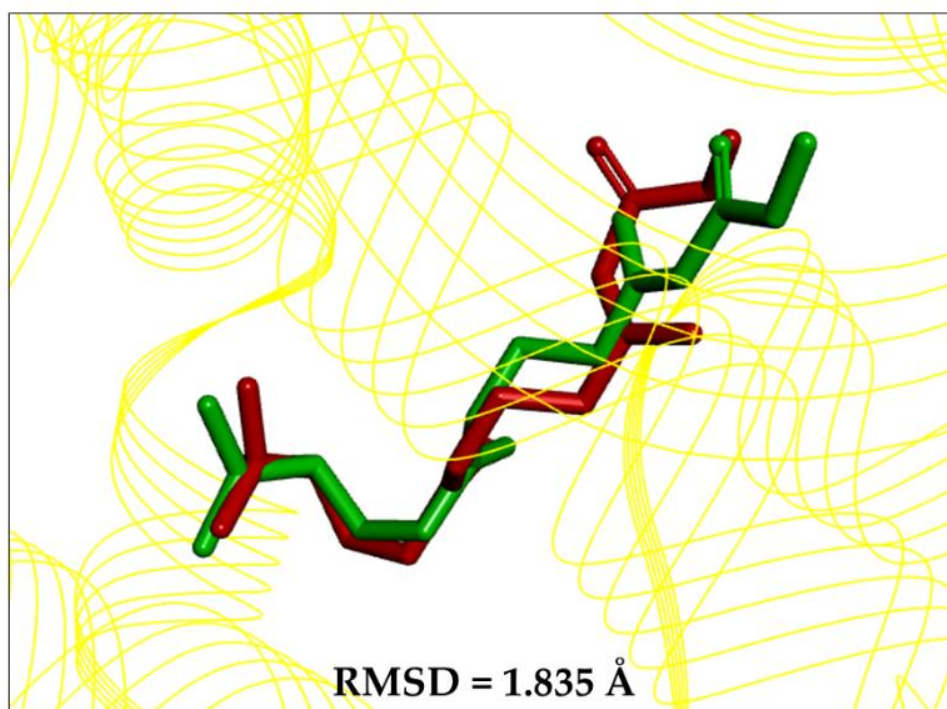

Figure S3. Structural superposition of crystallographic (green) and better docked pose (red) of JHII.



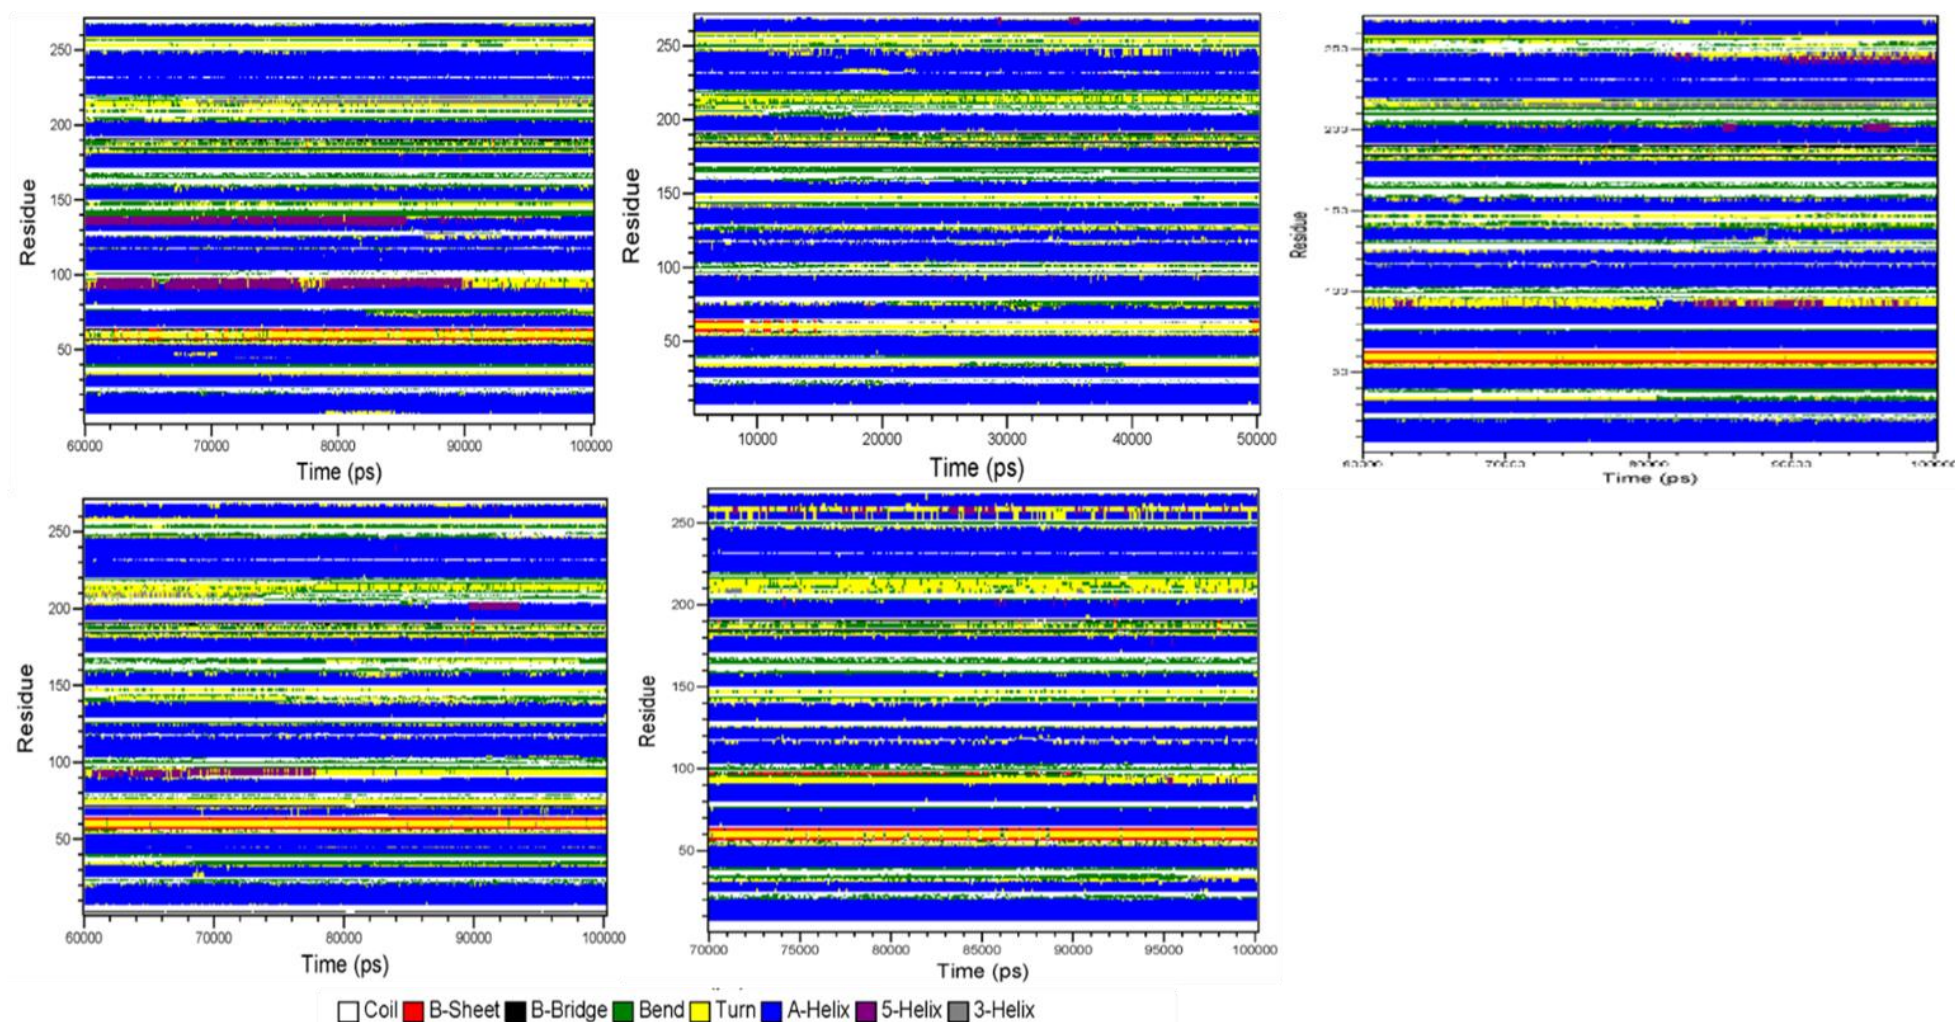

Figure S4. Secondary structure evaluation for productive phase of Aedes aegypti Juvenile Hormone-Binding Protein (AagJHBP) complexes analyzed by DSSP 3.1.4 [38–41] module installed on GROMACS 5.1.4 [37,38]. From upper left corner to the right: apo, holo, Pyri, MP-073 and MP-416.
